# Supplementary material for: Optimal Dispatching of Smart Hybrid Energy Systems for Addressing a Low-Carbon Community
Source: MDPI journal article supplement (doi:10.3390/en16093698), 2023-04-25
Supplement: s1 [file s1]

Archive with 1 entries (1 files):
- energies-2290312-supplementary.pdf
