# Supplementary figures and images for: Optimal Dispatching of Smart Hybrid Energy Systems for Addressing a Low-Carbon Community
Source: MDPI journal article supplement (doi:10.3390/en16093698), 2023-04-25

## SUPPLEMENTARY MATERIALS

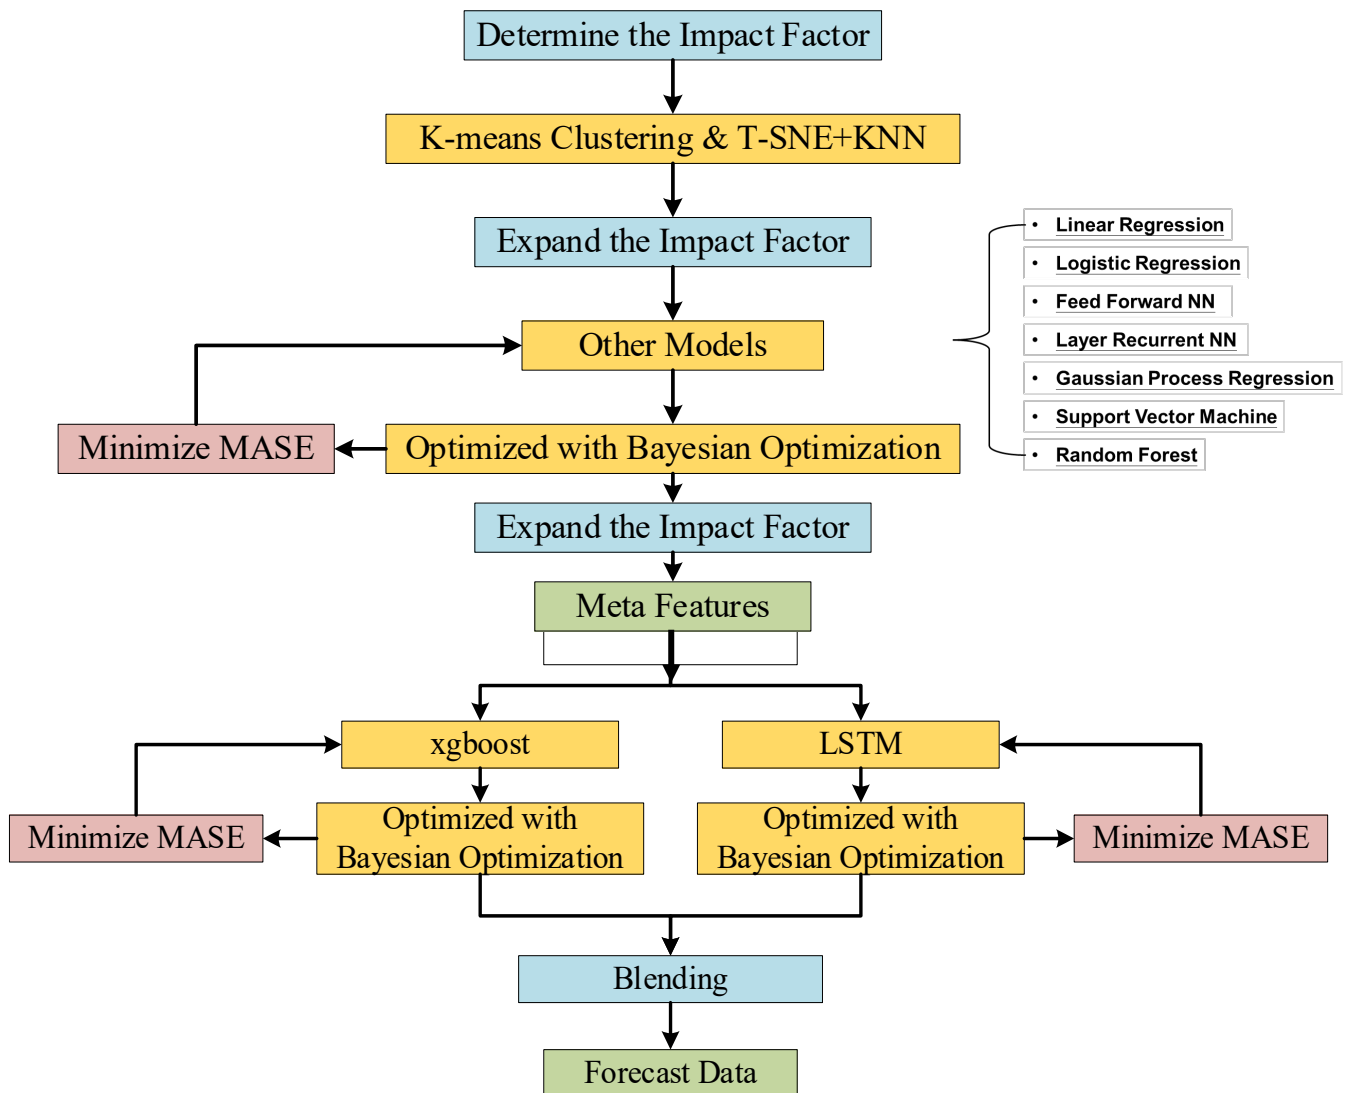

**Figure S1.** Flowchart of forecasting process from Level 1 to Level 3.

Supplement: s1 [file s1 › energies-2290312-supplementary.pdf]
